# Supplementary material
Source: Springer Nature journal article supplement (https://www.springermedizin.de/resource/supplementary/13098_2013_287_MOESM3_ESM.pdf/9670988)
Supplement: MOESM3 [file 9670988]

**Figure 3.**

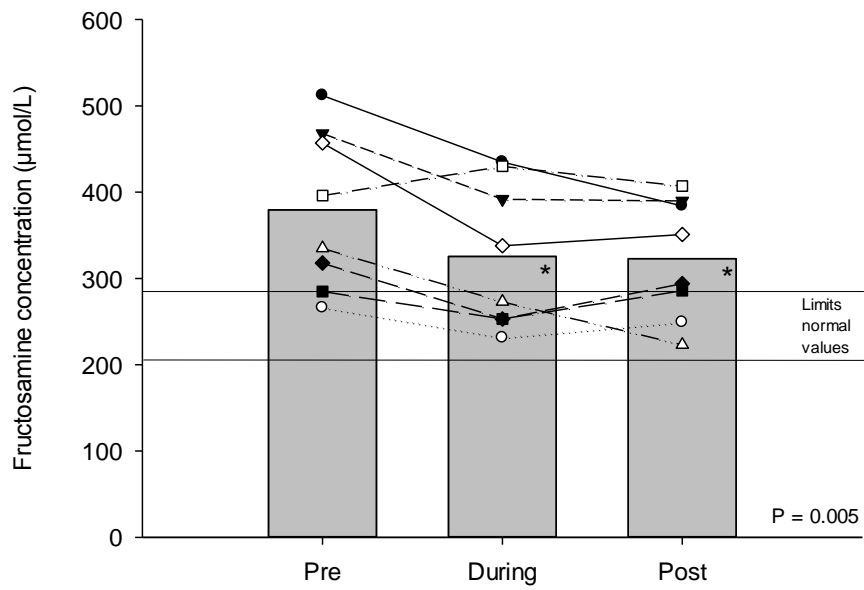

**Figure 3. Mean concentration of fructosamine pre, during and post study. \*Statistically significant difference between the study periods ( $P = 0.005$ ).**
